# Supplementary material for: Safety and Comfort of an Innovative Drug Delivery Device in Healthy Subjects
Source: PubMed Central journal article supplement (PMC7757610; doi:10.1167/tvst.9.13.35), 2020-12-18
Supplement: tvst-9-13-35_s001.pdf [file tvst-9-13-35_s001.pdf]

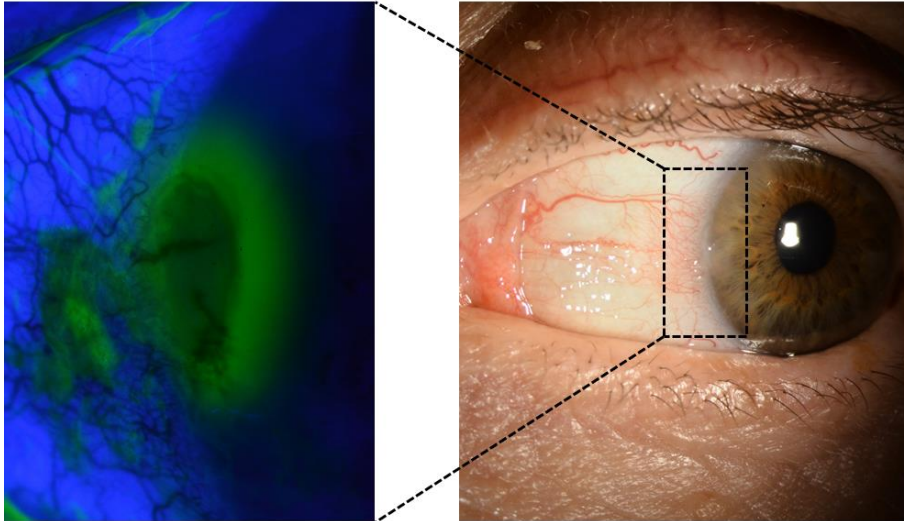

**Figure S1.** Corneal erosion due to a twig in the eye of a subject (unrelated to the ocular coil). Slit lamp images at 6.3x magnification and insert at 16x magnification stained with fluorescein.
