# Supplementary material for: Safety and Comfort of an Innovative Drug Delivery Device in Healthy Subjects
Source: PubMed Central journal article supplement (PMC7757610; doi:10.1167/tvst.9.13.35), 2020-12-18
Supplement: tvst-9-13-35_s003.pdf [file tvst-9-13-35_s003.pdf]

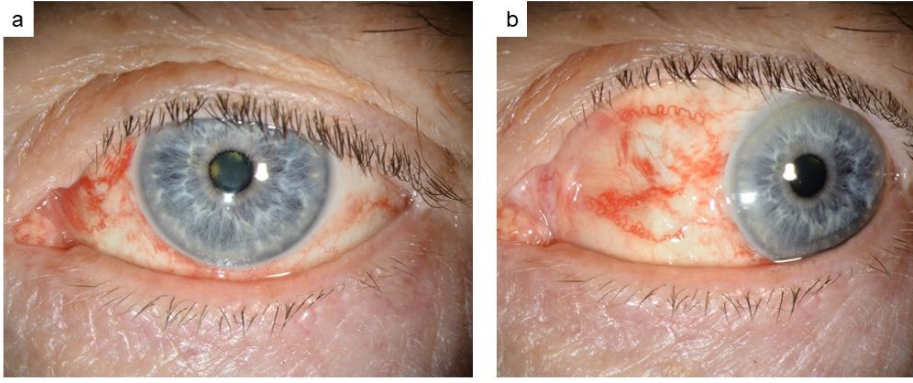

**Figure S3.** Photo of a hyposphagma (a) gazing forward, and (b) left gaze direction.
