# Supplementary material for: Safety and Comfort of an Innovative Drug Delivery Device in Healthy Subjects
Source: PubMed Central journal article supplement (PMC7757610; doi:10.1167/tvst.9.13.35), 2020-12-18
Supplement: tvst-9-13-35_s004.pdf [file tvst-9-13-35_s004.pdf]

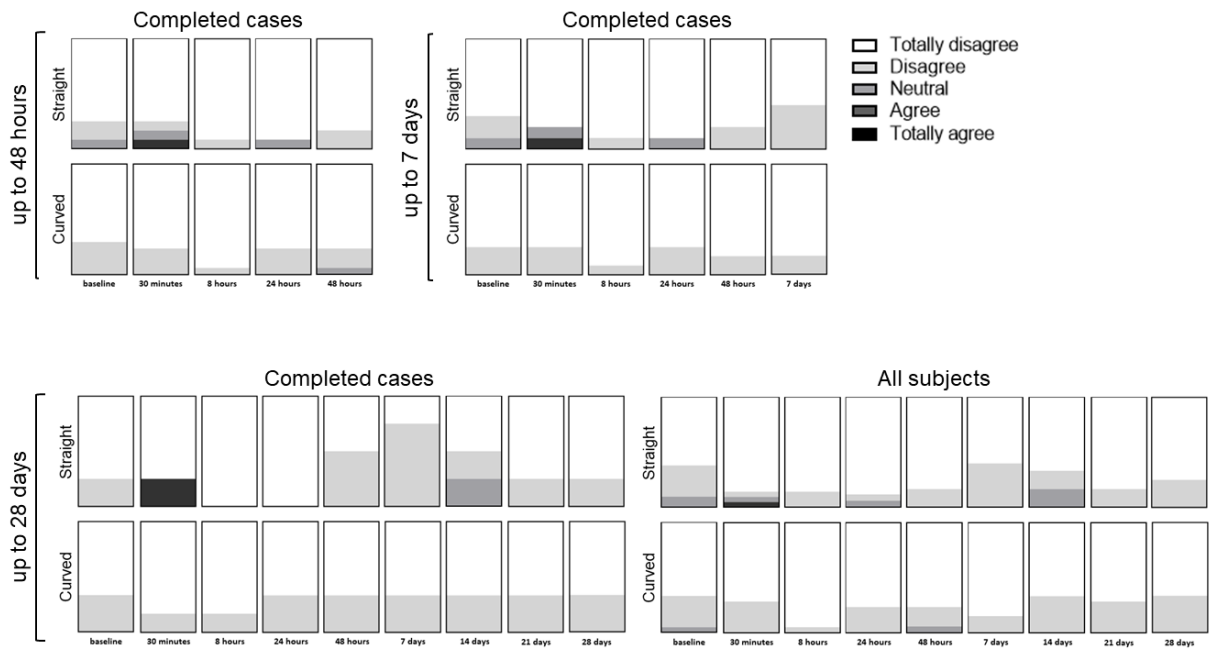

**Figure S4.** Questionnaire ‘My eye has a high tear production’. Completed cases for 48 hours ( $n_{\text{straight}}=12$ ,  $n_{\text{curved}}=17$ ), 7 days ( $n_{\text{straight}}=10$ ,  $n_{\text{curved}}=12$ ), 28 days ( $n_{\text{straight}}=4$ ,  $n_{\text{curved}}=6$ ), and the analysis of all subjects at 28 days ( $n_{\text{straight\_baseline}}=21$ ,  $n_{\text{curved\_baseline}}=21$ ) for both the straight and curved ocular coil.
